# Supplementary material for: Environmentally friendly fire-resistant epoxy resins based on a new oligophosphonate with high flame retardant efficiency
Source: Royal Society of Chemistry journal article supplement (doi:10.1039/c5ra27451f), 2016-01-01
Supplement: c5ra27451f1.pdf [file c5ra27451f1.pdf]

## Environmentally friendly fire resistant epoxy resins based on a new oligophosphonate with high flame retardant efficiency

Corneliu Hamciuc,<sup>a</sup> Tachita Vlad-Bubulac,<sup>a</sup> Diana Serbezeanu,<sup>a</sup> Ionela-Daniela Carja,<sup>a</sup>  
Elena Hamciuc,<sup>a</sup> Gabriela Lisa<sup>b</sup> and Vicente Forrat Pérez<sup>c</sup>

<sup>a</sup> "Petru Poni" Institute of Macromolecular Chemistry, Aleea Gr. Ghica Voda 41A, 700487 Iasi, Romania

<sup>b</sup> Department of Chemical Engineering, Gheorghe Asachi Technical University of Iasi, Bd. Mangeron 73, 700050 Iasi, Romania

<sup>c</sup> Technological Institute of Construction Marble Technical Unit (AIDICO), Camí de Castella 4, 03660 Novelda-Alicante, Spain

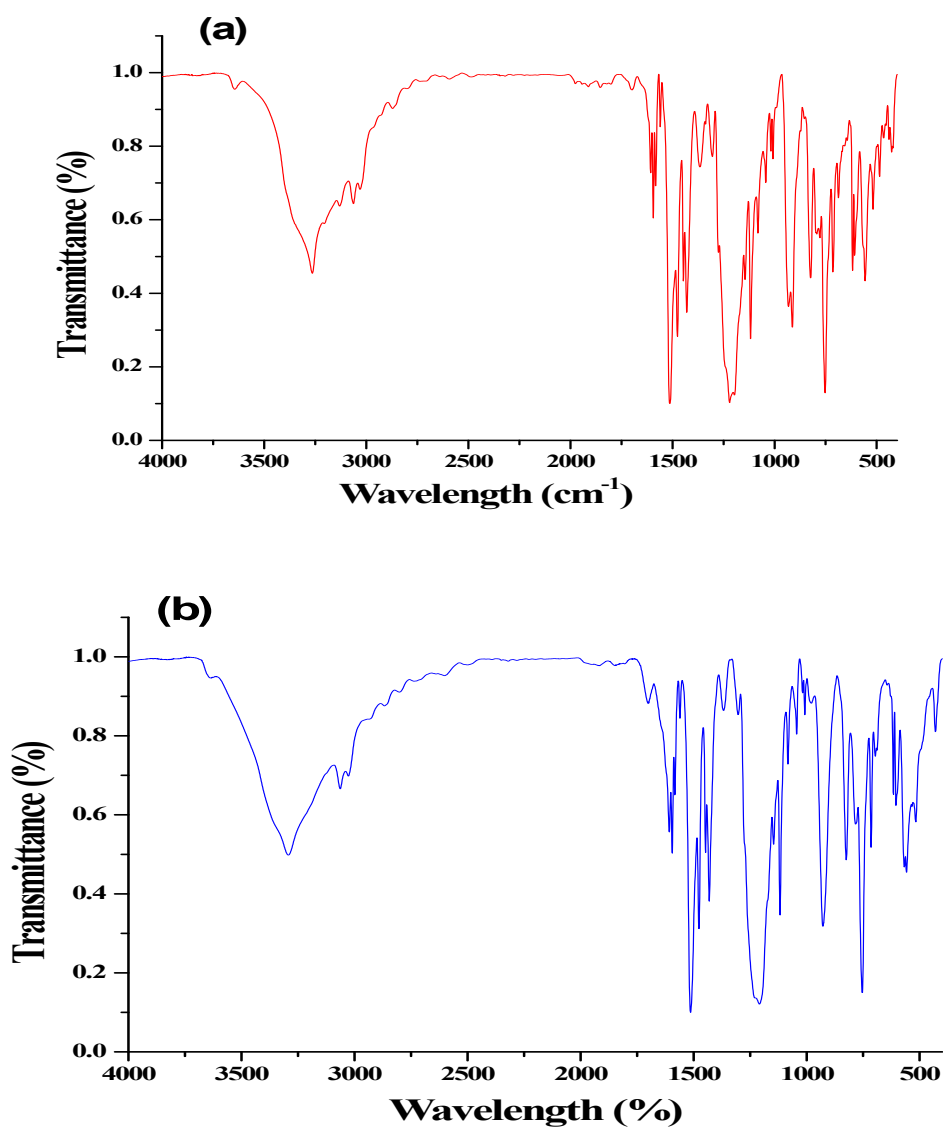

Fig. S1 FTIR spectra of bisphenol 2 (a) and oligophosphonate PFR (b).

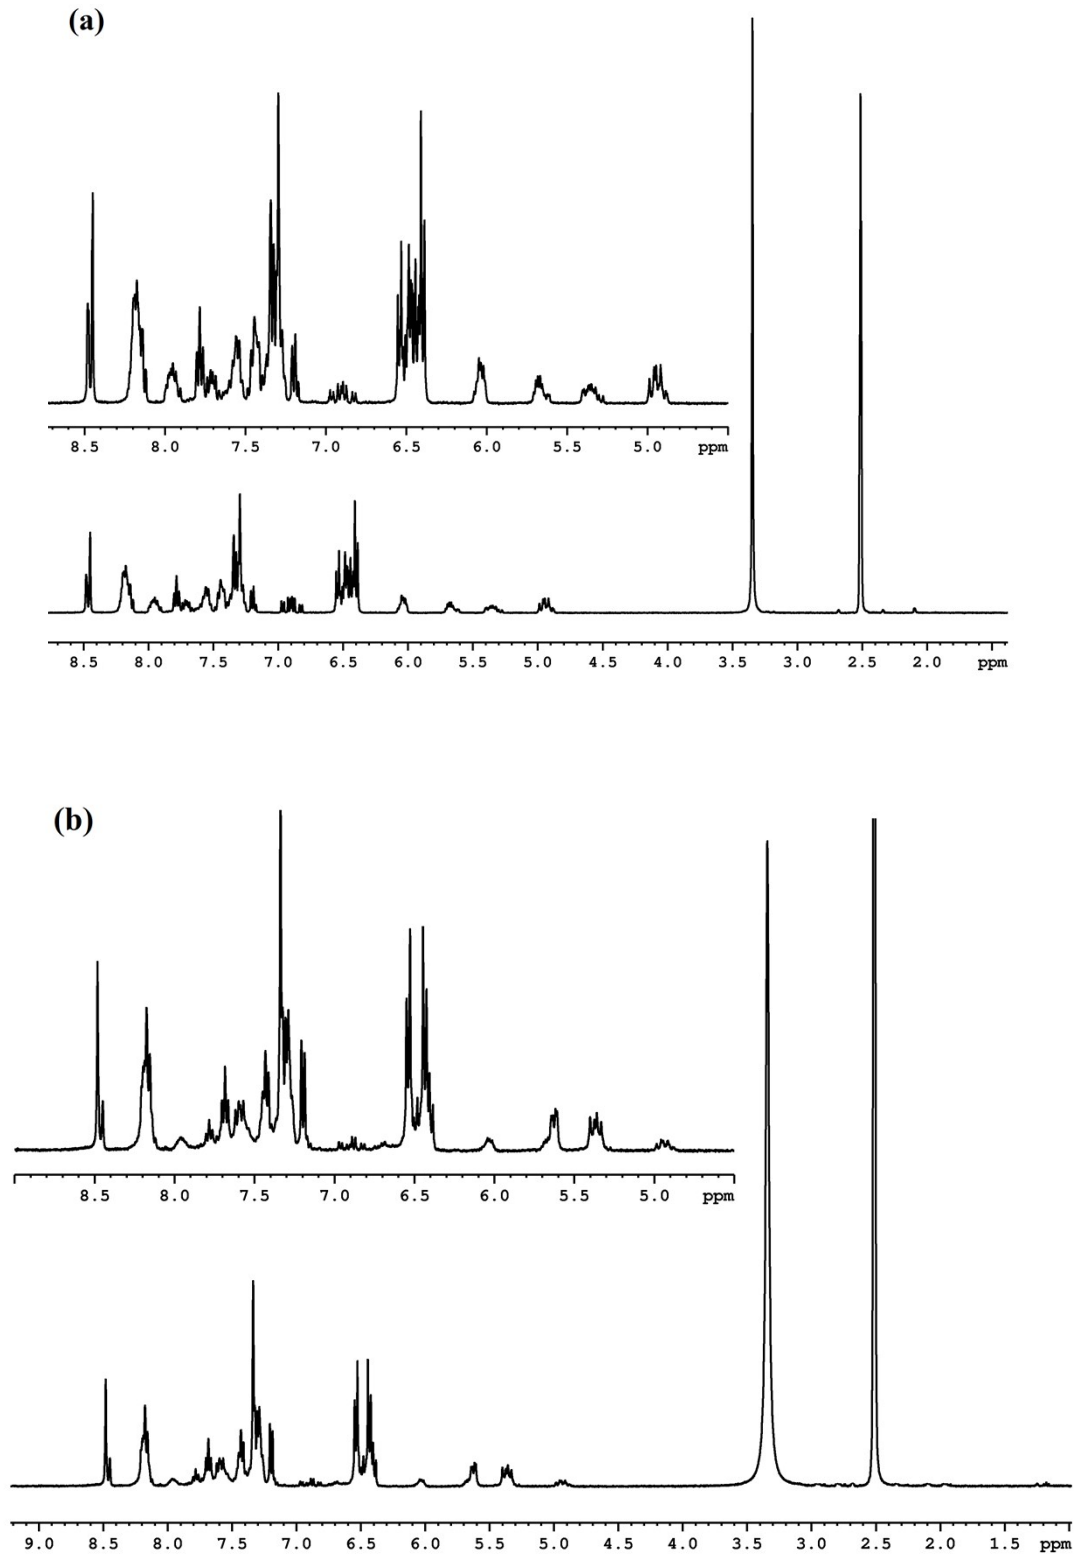

Fig. S2  $^1\text{H-NMR}$  spectra of bisphenol 2 (a) and oligophosphonate PFR (b).

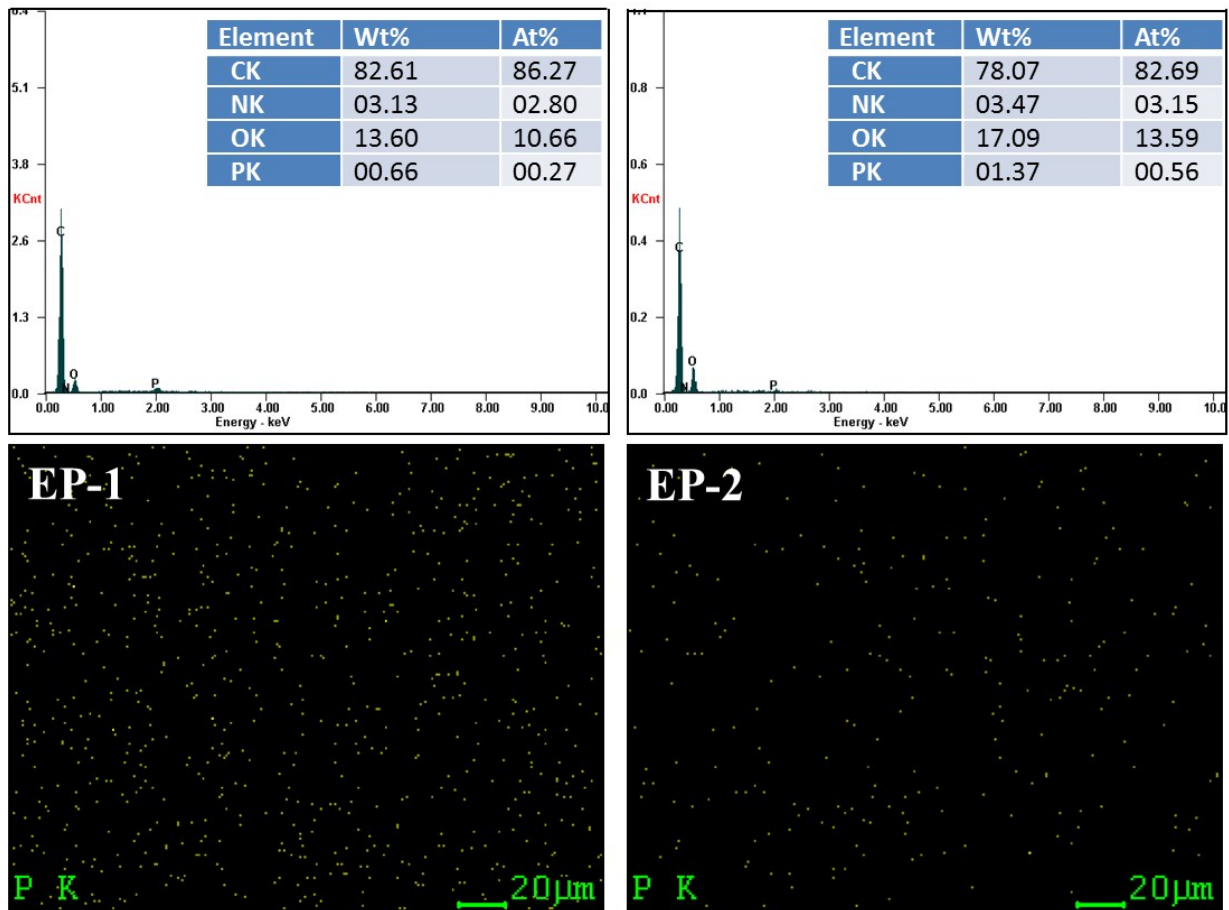

Fig. S3 EDX spectra and EDX mapping (P = phosphorus) of EP-1 (left) and EP-2 (right).

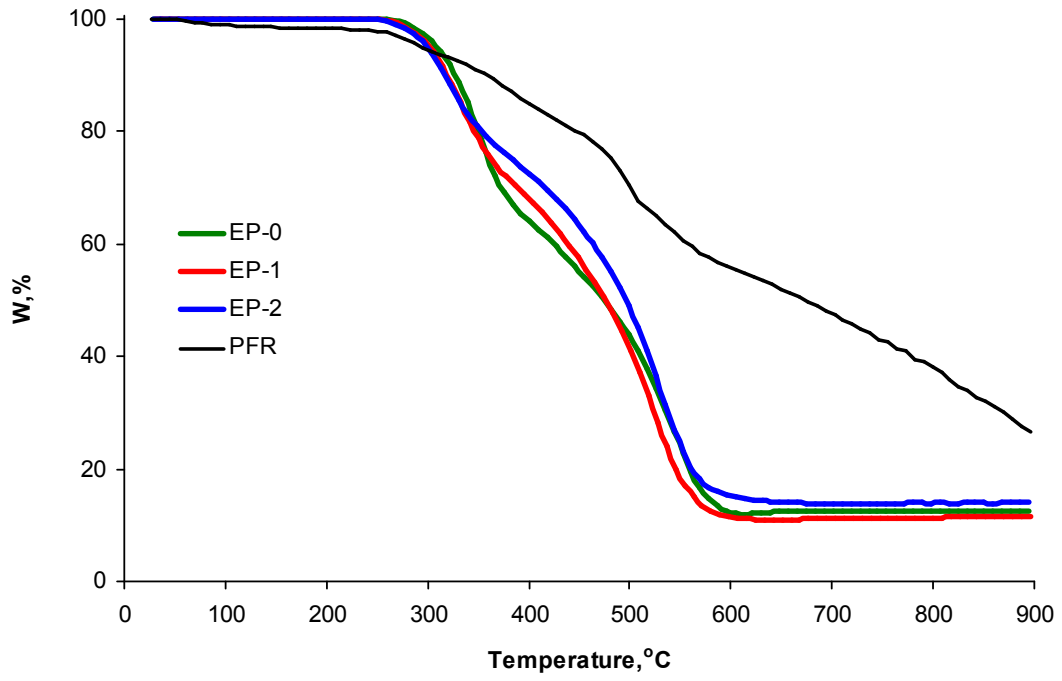

(a)

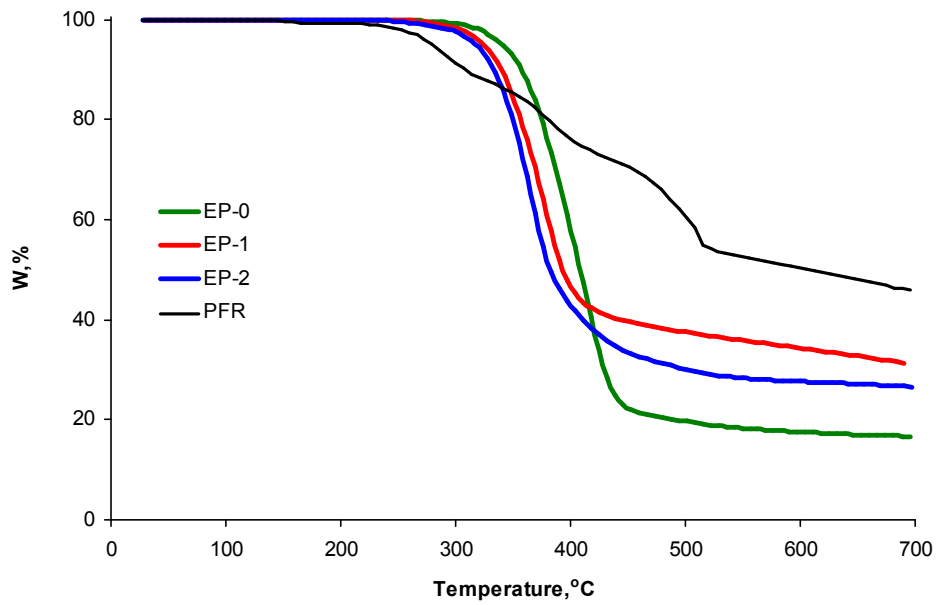

(b)

Fig. S4 Comparative TG curves, in air (a) and nitrogen (b).

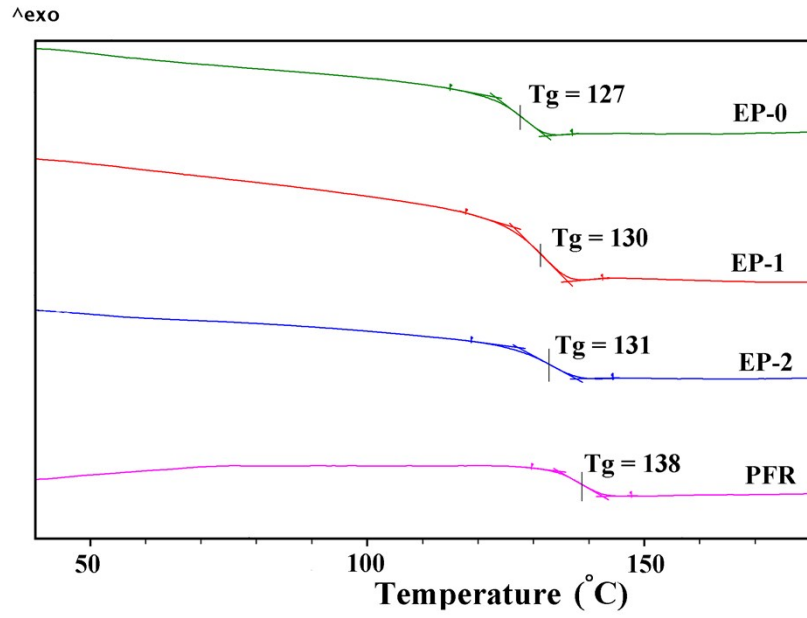

Fig. S5 DSC curves of PFR, EP-0, EP-1 and EP-2.

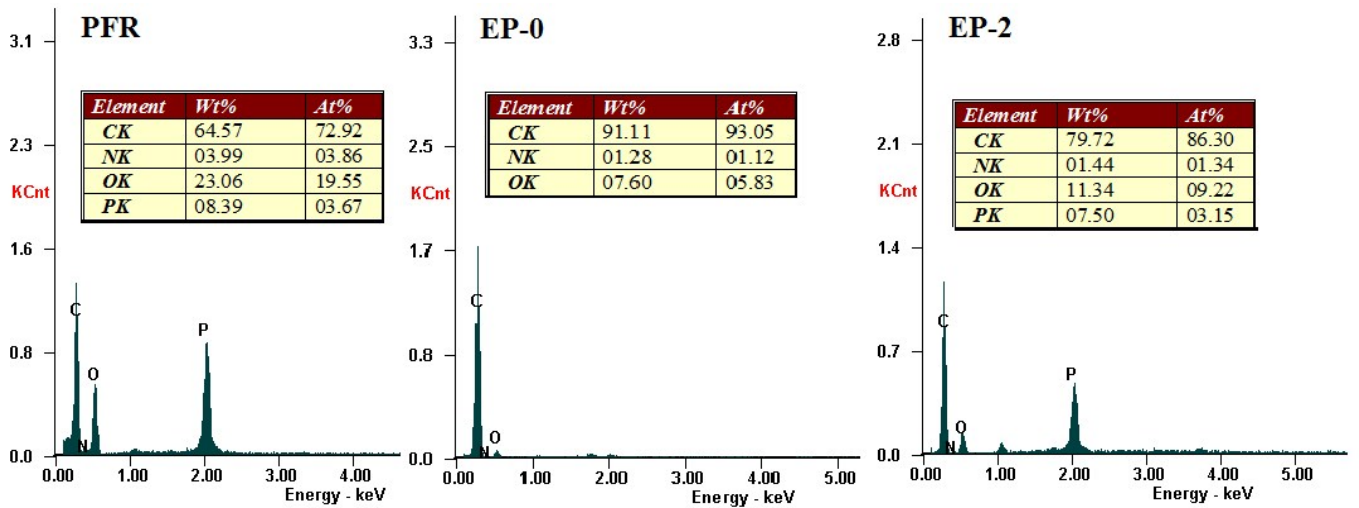

Fig. S6 EDX spectra of PFR, EP-0 and EP-2 heated up to 700°C with the heating rate of  $10^{\circ}\text{C min}^{-1}$ , in nitrogen.
